# Supplementary material
Source: PubMed Central journal article supplement (PMC4326581)

**A**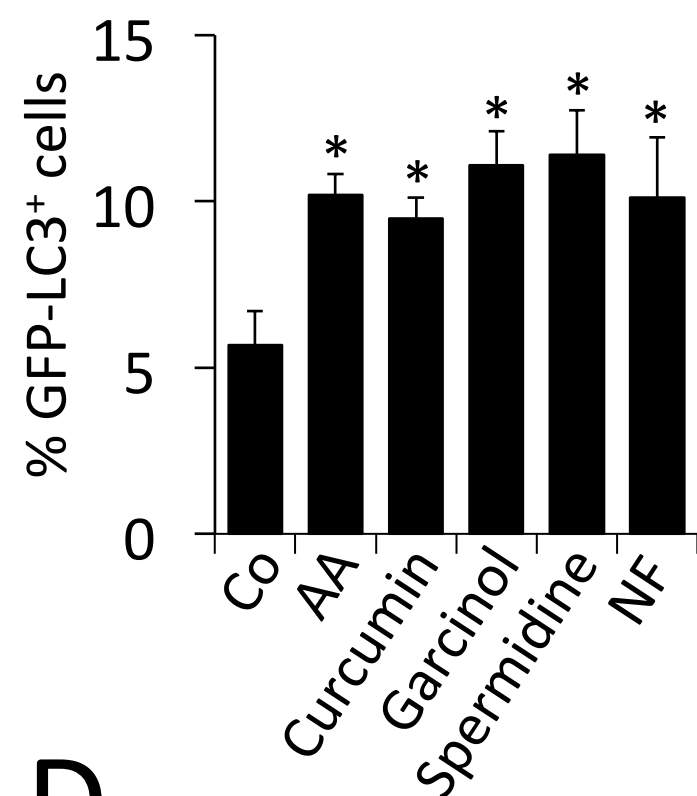**B**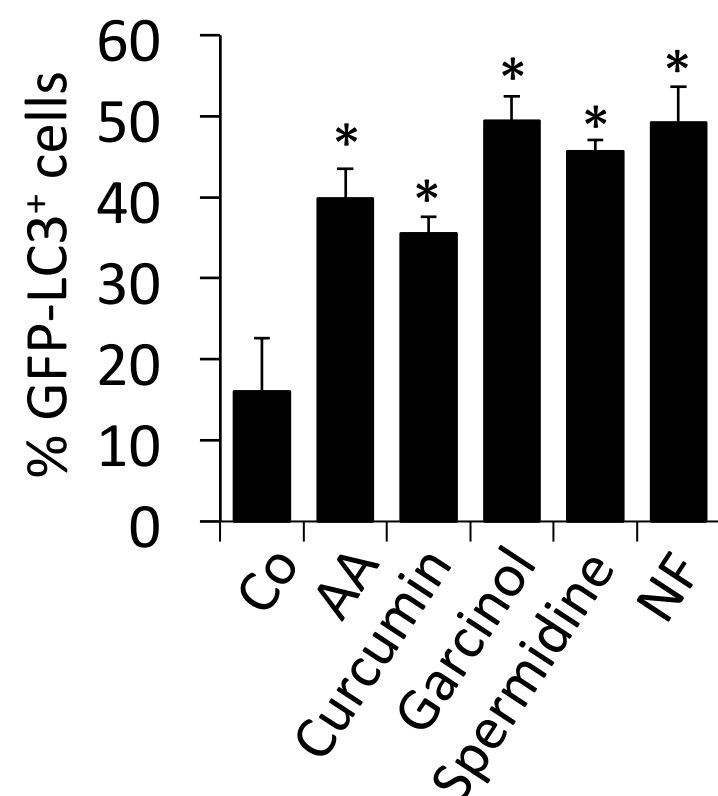**C**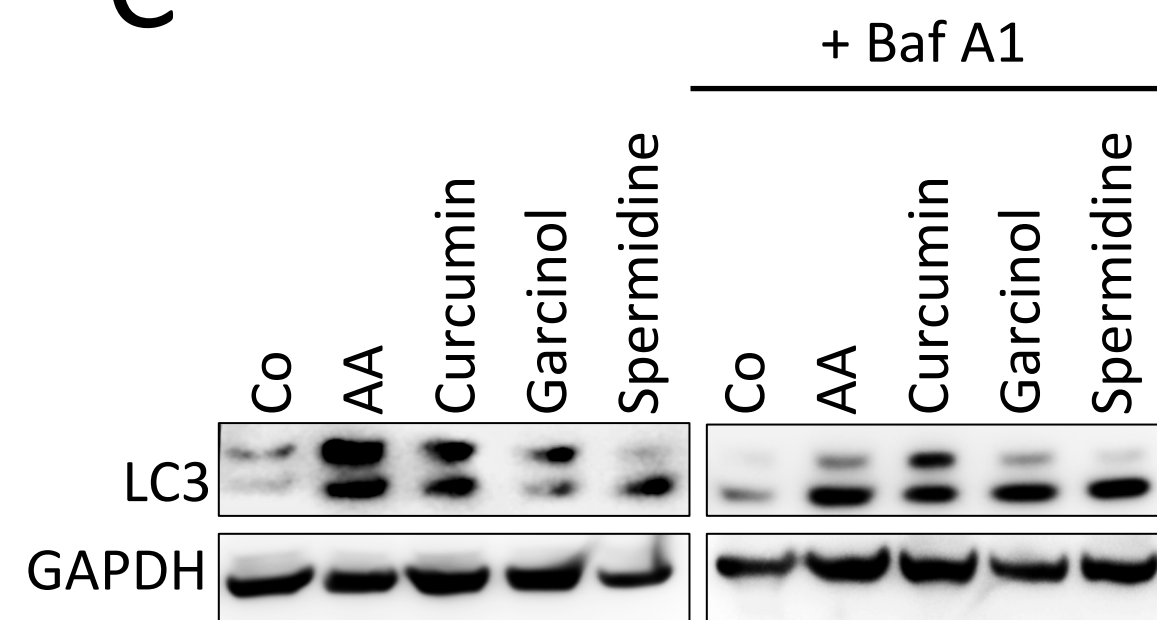**D**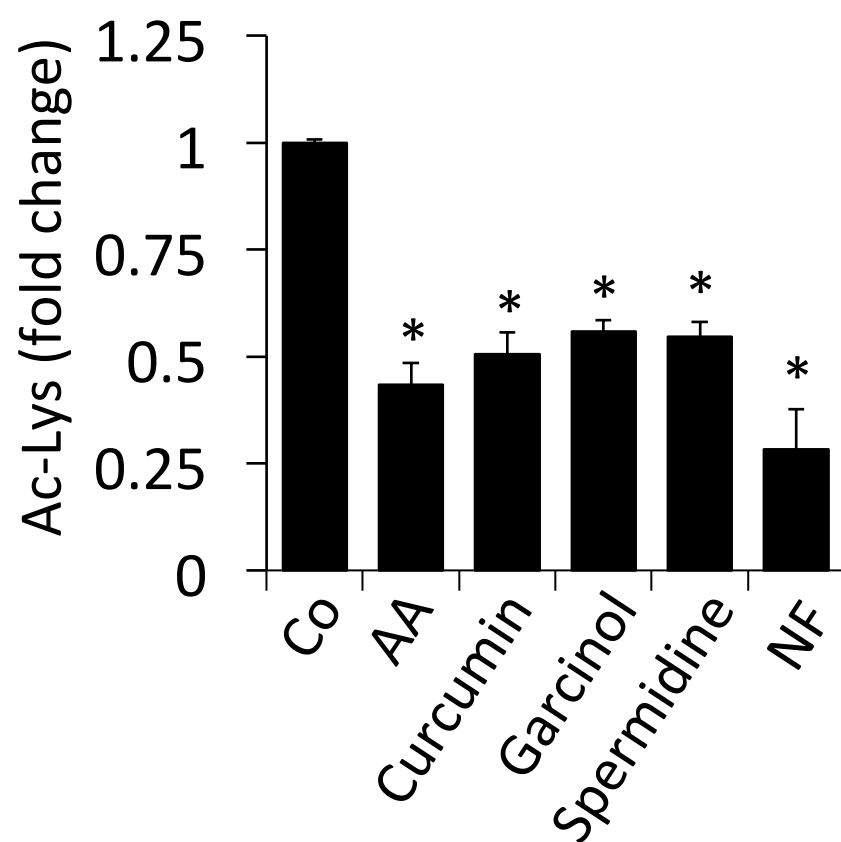**E**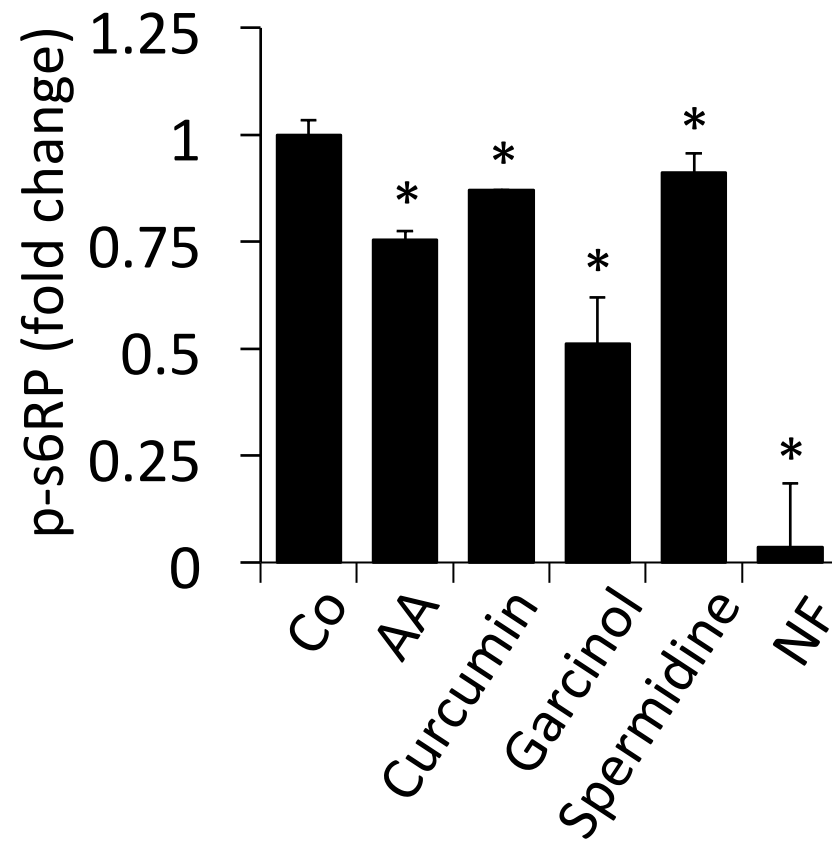**F**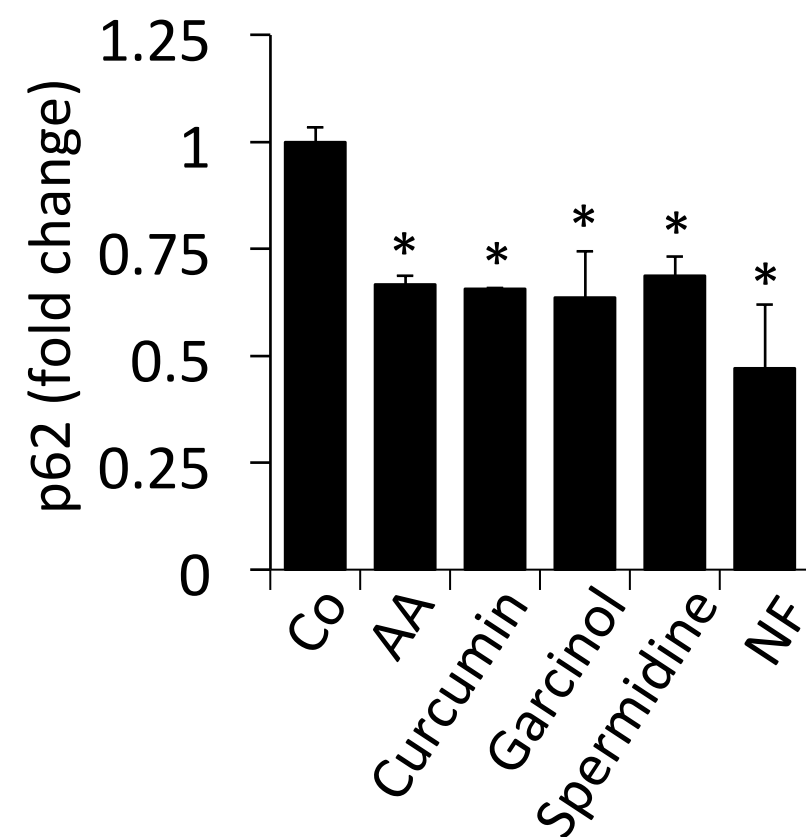

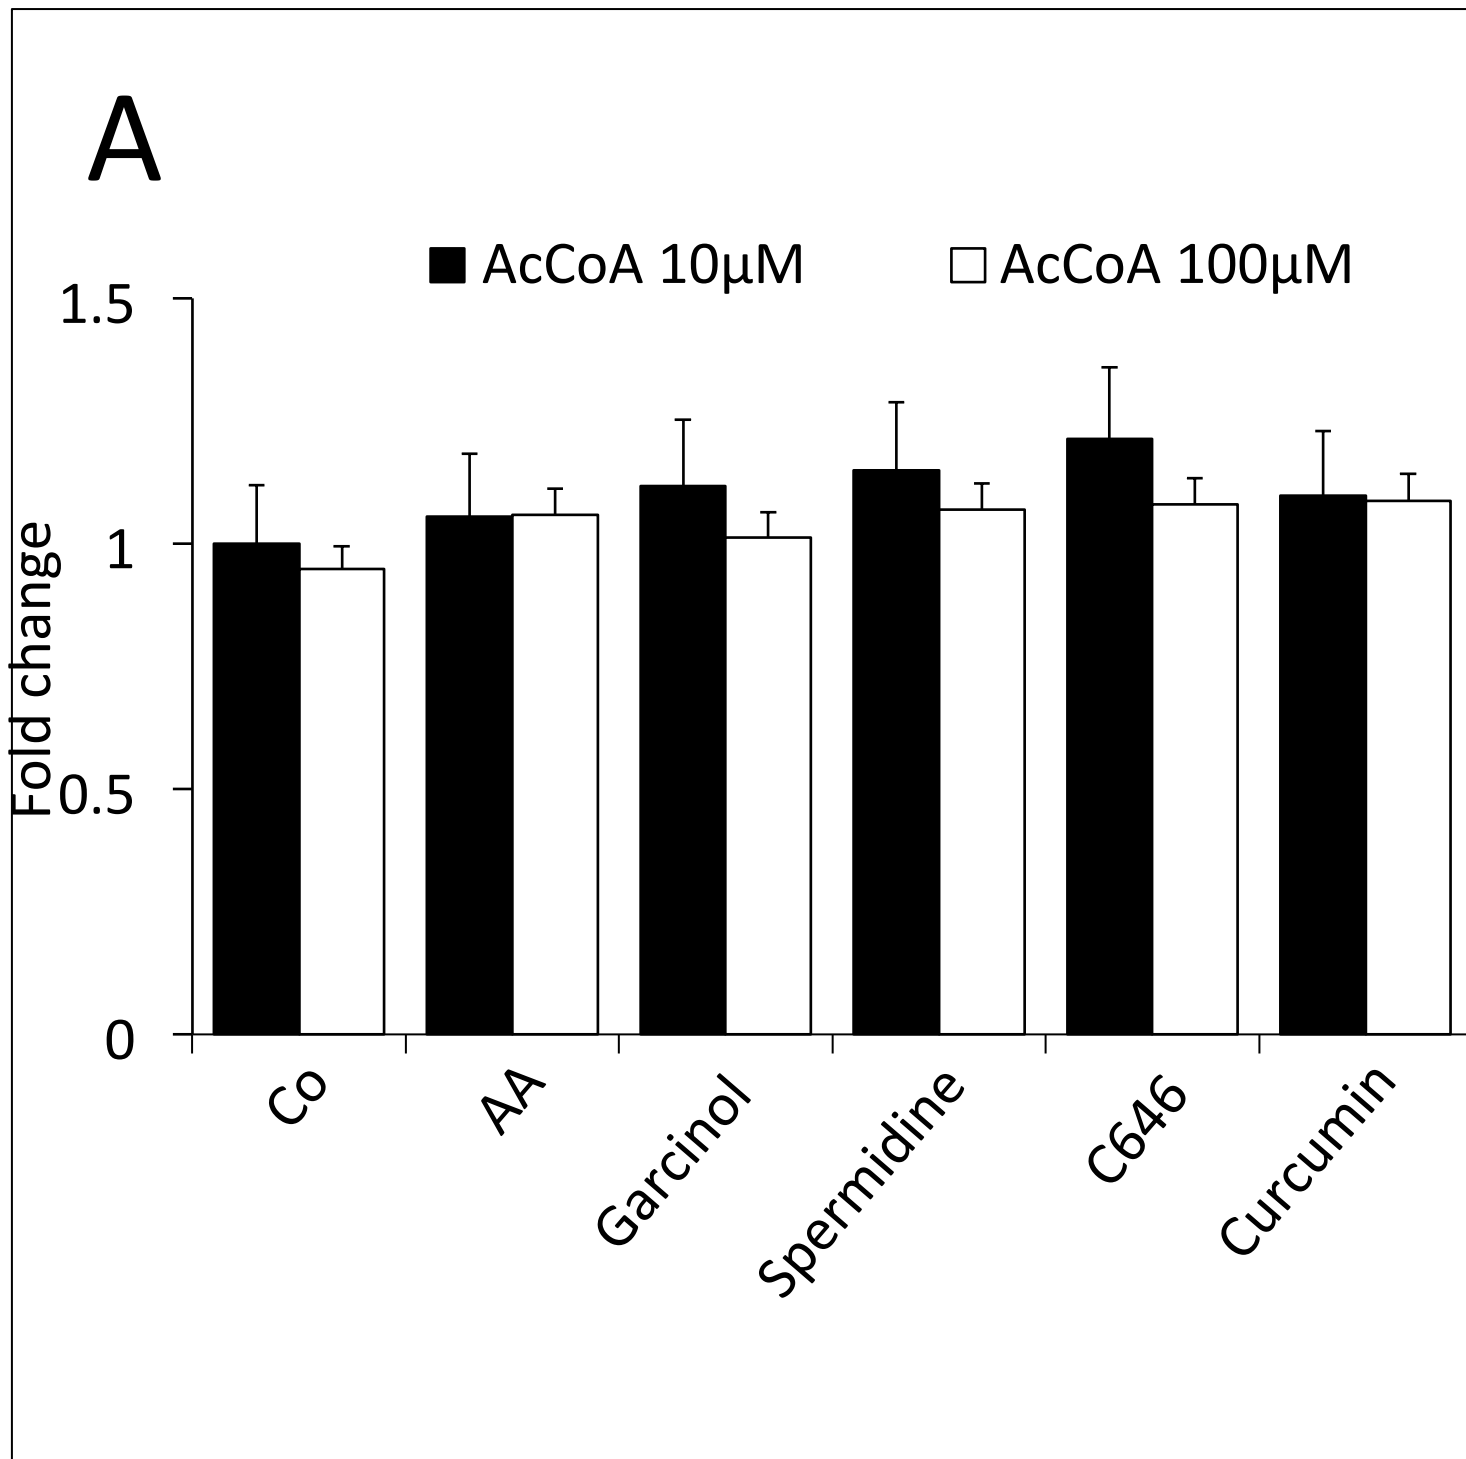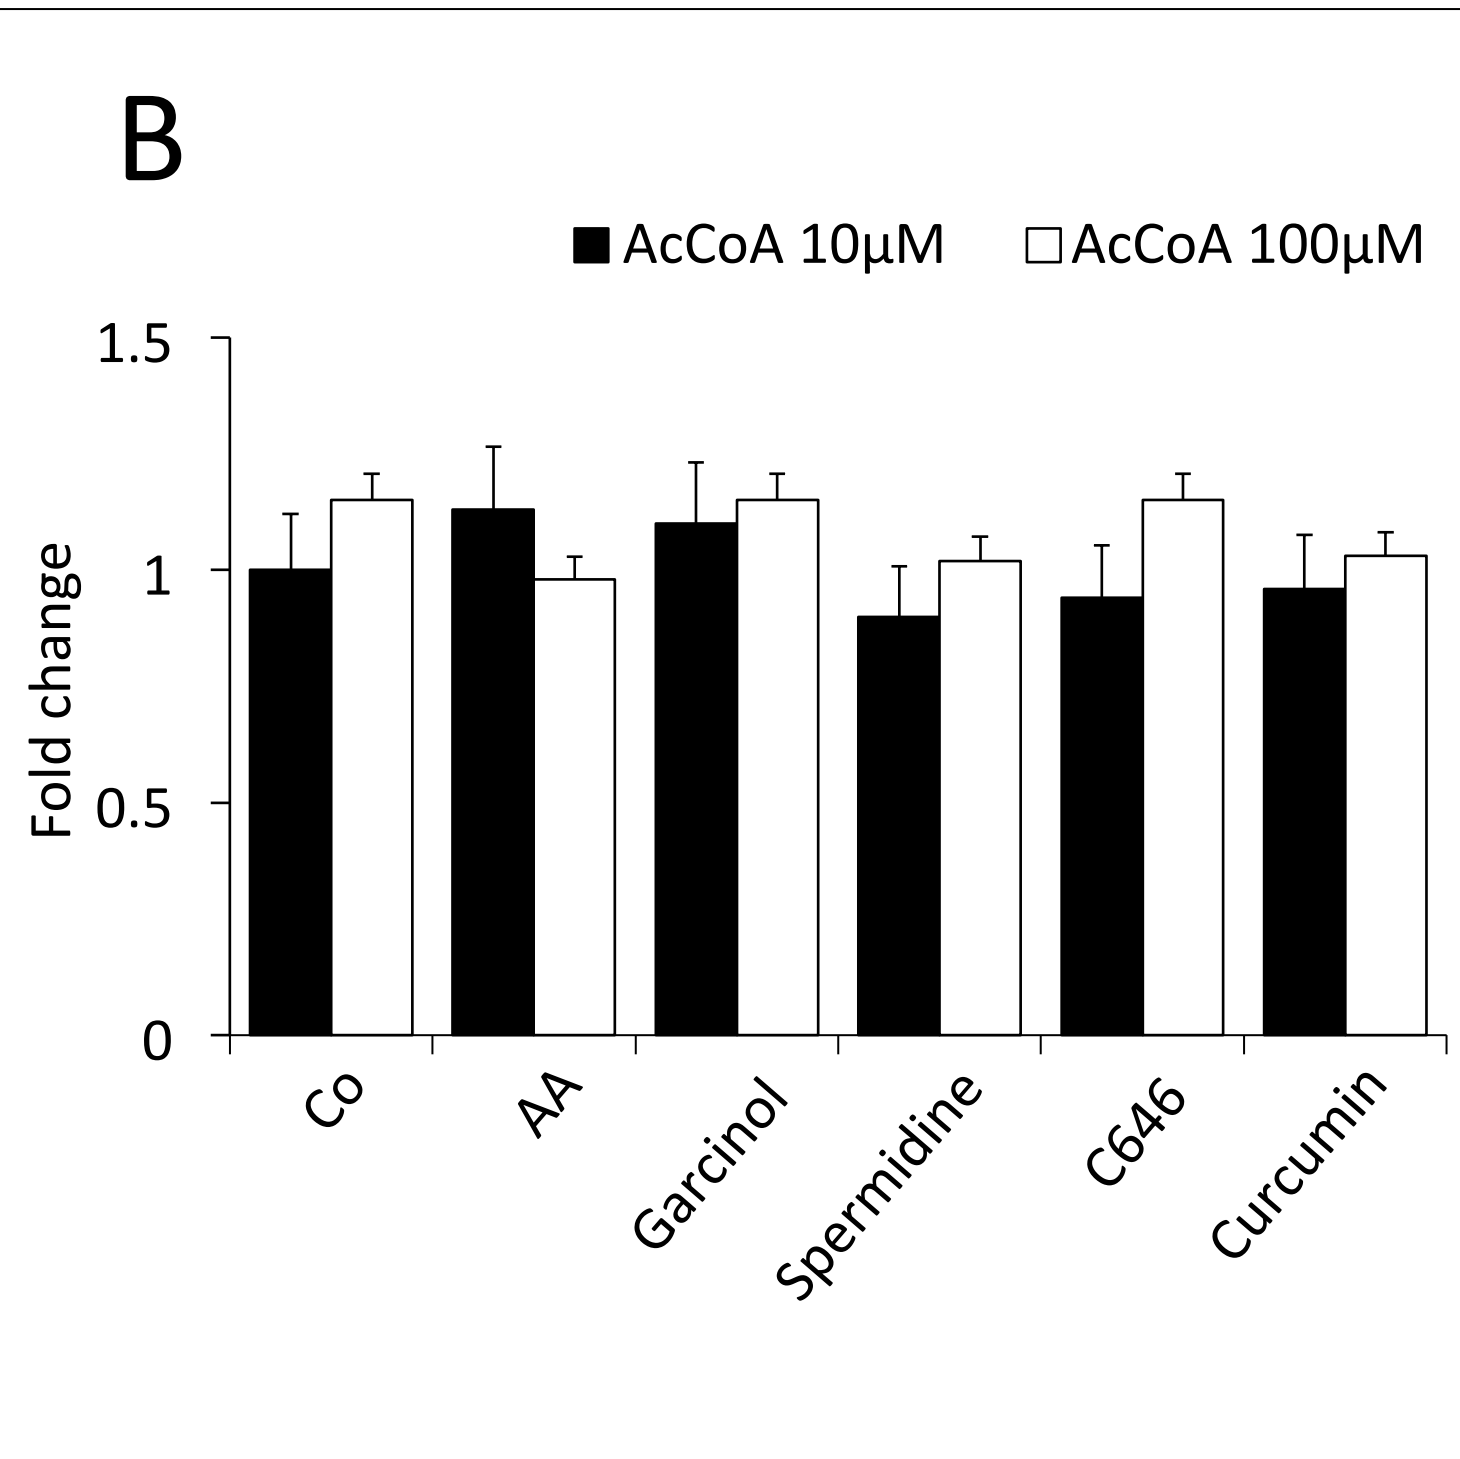

Supplemental  
Figure 2

Supplement: cdd2014215x1.pdf [file cdd2014215x1.pdf]
